# Supplementary material for: Site-selective heat boosting electrochemiluminescence for single cell imaging
Source: Royal Society of Chemistry journal article supplement (doi:10.1039/d3sc02298f), 2023-01-01
Supplement: d3sc02298f1.pdf [file d3sc02298f1.pdf]

# Site-Selective Heat Boosting Electrochemiluminescence for Single Cell Imaging

Xiaodan Gou, Yiwen Zhang, Zejing Xing, Cheng Ma,\* Changjie Mao,\* Jun-Jie Zhu,\*.

---

**ABSTRACT:** In operando visualization of local electrochemical reactions provides mechanical insights into the dynamic transport of interfacial charge and reactant/product. Electrochemiluminescence is a crossover technique that quantitatively determines faraday current and mass transport in a straightforward manner. However, the sensitivity is hindered by low collision efficiency of radicals and side reactions at high voltage. Here, we report a site-selective heat boosting electrochemiluminescence microscopy. The luminescence intensity was enhanced up to 63 times and the applied voltage was advanced by 0.2 V thanks to a micron scale heat point in situ generated at electrode-solution interface. Experimental results and finite element simulation demonstrate that the fundamental reasons are accelerated reaction rate and thermal convection via photothermal effect. The concentrated electrochemiluminescence not only boosts the contrast of single cells by 20.54 times but also enables the site-selective cell-by-cell analysis for the heterogeneous membrane protein abundance. This electrochemical visualization method has great potential in highly sensitive and selective analysis of local electron transfer occurred in organism and catalyst.

---

2 **Table of Contents**

3 Chemicals and reagents ..... 3

4 Cell culture and labeling for imaging ..... 3

5 Synthesis of RuDSNs ..... 3

6 Synthesis of MSN ..... 3

7 Synthesis of NCDs/MSN ..... 3

8 Synthesis of Ru(bpy)<sub>3</sub><sup>2+</sup> labeled beads ..... 4

9 Results and Discussion ..... 4

10 COMSOL simulation ..... 8

11 Reference ..... 23

12

## 13 Chemicals and reagents

14 Unless otherwise stated, all chemicals and reagents were used as received without further purification. Ultrapure water with a  
15 resistivity of 18.2 M $\Omega$ ·cm was produced by using a Milli-Q apparatus (Millipore) and used in the preparation of all solutions.  
16 Tris(2,2'-bipyridyl) dichlororuthenium (II) hexahydrate (Ru(bpy)<sub>3</sub>Cl<sub>2</sub>), tripropylamine (TPrA), 1-ethyl-3-(3-dimethylaminopropyl)  
17 carbodiimide (EDC), 1.5  $\mu$ m and 5  $\mu$ m micro particles based on silicon dioxide (SiO<sub>2</sub> balls), and 10  $\mu$ m carboxylated polystyrene  
18 (PS) microspheres were purchased from Sigma-Aldrich. Tris(2,2'-bipyridine)ruthenium-bis(hexafluorophosphate) (Ru(bpy)<sub>3</sub>PF<sub>6</sub>),  
19 branched polyethyleneimine (PEI, MW = 600), tetraethylorthosilicate (TEOS), bis(2,2'-bipyridine)-4'-methyl-4-carboxybipyridine-  
20 ruthenium N-succinimidyl ester-bis(hexafluorophosphate) (Ru(bpy)<sub>2</sub>(mcbpy-O-Su-ester)(PF<sub>6</sub>)<sub>2</sub>), sulfosuccinimidyl biotin (sulfo-  
21 NHS-biotin), Cetrimonium tosylate (CTAT) and Triethanolamine (TEA) were purchased from Aladdin Reagent Inc. Triton X-100  
22 was purchased from Macklin Biochemical Co., Ltd. 4% paraformaldehyde solution, phosphate buffer solution for cell culture (PBS,  
23 100 mM, pH 7.3), phosphate buffer solution (PBS, 10 Mm, pH 7.4) and Roswell Park Memorial Institute 1640 medium (RPMI-  
24 1640, containing 2.0 mg/mL D-glucose, 0.3 mg/mL glutamine, 2.0 mg/mL NaHCO<sub>3</sub>, 80 U/mL penicillin, and 0.08 mg/mL  
25 streptomycin) were purchased from KeyGEN BioTECH. Dimethyl sulfoxide (DMSO, 99.9%, SuperDry, J&KSeal) was obtained  
26 from J&K Scientific (Shanghai, China). ITO was purchased from Zhongjingkeyi Technology Co., Ltd. Prior to use, glassy carbon  
27 electrodes (GCE) and gold electrodes (3 mm in diameter) were polished sequentially with 1, 0.3 and 0.05  $\mu$ m alumina powder on a  
28 suede cloth, then ultrasonic cleaned with ethanol and ultrapure water twice. At last, the electrodes were dried under a N<sub>2</sub> flow.

## 29 Cell culture and labeling for imaging

30 A CEM cell line were purchased from the Institute of Cell Biology at the Chinese Academy of Sciences (Shanghai, P. R. China)  
31 and cultured in RPMI-1640 medium at 37 °C under 5% CO<sub>2</sub> atmosphere for 24h. Prior to experiment, the cell culture medium was  
32 discarded and cells were rinsed twice with PBS. For non-labeling ECL imaging, CEM cells would be placed on the GCE and fixed  
33 with paraformaldehyde for 10 min. Subsequently, the solution was discarded and cells were rinsed twice with PBS, followed by  
34 adding PBS solution containing luminophore Ru(bpy)<sub>3</sub>Cl<sub>2</sub> and coreactant TPrA (or just TPrA). The labeling of CEM cell was partly  
35 referenced to the previous literature.<sup>1</sup> Briefly, a solution of 100  $\mu$ L ruthenium complex (10 mg/mL) in anhydrous DMSO, 100  $\mu$ L  
36 streptavidin (1mg/mL in PBS), and 400  $\mu$ L PBS was mixed for 4 h and subsequently dialyzed overnight at 4 °C. The CEM cells in  
37 PBS solution were then centrifuged at 1000rpm for 5 min, mixed with PBS solution containing 5 mg/ml sulfo-NHS-biotin and  
38 reacted for half an hour at 4 °C. Before ECL imaging, the biotin labeled CEM cells were rinsed with cold PBS twice and placed on  
39 the GCE, fixed by paraformaldehyde for 10 min, labeled with streptavidin-ruthenium complex solution SA@Ru (0.1 mg/mL) for 1  
40 h.

## 41 Synthesis of RuDSNs

42 The RuDSNs were prepared as previously reported.<sup>2</sup> Briefly, 1.77 mL of Triton X-100 was dispersed into 1.8 mL n-hexanol and  
43 7.5 mL cyclohexane under stirring for 10 minutes. Then, 340 mL of 0.04 M Ru(bpy)<sub>3</sub><sup>2+</sup> aqueous solution and 100 mL TEOS was  
44 added into the mixture in order. To initiate the polymerization, 60 mL NH<sub>3</sub>·H<sub>2</sub>O was added after 5 minutes. The reaction was left  
45 for 24 h at 25 °C with gentle stirring. Then, 2 mL acetone was added and the solution was sonicated for another 1 h. After carefully  
46 washing with ethanol twice to remove extra Ru(bpy)<sub>3</sub><sup>2+</sup> and residual surfactant molecules, the precipitation was dispersed in 10 ml  
47 ethanol.

## 48 Synthesis of MSN

49 MSN were synthesized according to the previous report.<sup>3</sup> 0.17 g TEA with 1.0 g CTAT were stirred at 80 °C for 1h in 50 ml  
50 water. Subsequently, the TEOS of 2 mL was added and stirred for another 2h. After washing three times with ethanol, MSN were  
51 dried in oven at 60 °C overnight.

## 52 Synthesis of NCDs/MSN

53 NCDs were synthesized according to a previously reported hydrothermal method.<sup>4</sup> Briefly, 10 mL PEI (280 mg/mL) aqueous  
54 solution was heated at 180 °C for 4 h in a 50 mL Teflon-lined stainless-steel autoclave. When cooled down to room temperature,  
55 the sample was dialyzed against distilled water using dialysis membranes (MWCO = 10 kDa) for 3 days. Finally, the sample was  
56 lyophilized and stored at 4 °C. Prior to experiment, the NCDs were mixed with 1 mg/ml MSN overnight to get NCDs/MSN through  
57 electrostatic attraction.

58 **Synthesis of Ru(bpy)<sub>3</sub><sup>2+</sup> labeled beads**

59 For 1.5 μm and 5 μm Ru(bpy)<sub>3</sub><sup>2+</sup> labeled SiO<sub>2</sub> beads, firstly, 20 mg purchased SiO<sub>2</sub> beads were dispersed into anhydrous ethanol,  
60 followed by the addition of 500 mg of Ru(bpy)<sub>3</sub>Cl<sub>2</sub>. In the presence of 100 μL concentrated ammonia solution, 14.8 μL of TEOS  
61 was added to the solution in portions, vigorously stirred, and allowed to react for 20 hours. The resulting yellow solid was  
62 centrifuged and washed three times with ethanol. Subsequently, the solid was dispersed in ethanol for further use. For 10 μm  
63 carboxylated PS microspheres, which possess abundant carboxyl groups on their surface, 10 μL of the PS microspheres were  
64 centrifuged and dispersed in DMSO. Then, 5 mg of Ru-NHS and 40 mg EDC was added to the solution, and the mixture was stirred  
65 at room temperature for 2 hours. Subsequently, the mixture was centrifuged at 3000 rpm and dispersed in DMSO for future use.

66

67

68 **Results and Discussion**

69

70 **Table S1. The corresponding power density of laser and the current shown in current controller**

| Current (mA) | Power density (μW/μm <sup>2</sup> ) | Current (mA) | Power density (μW/μm <sup>2</sup> ) |
|--------------|-------------------------------------|--------------|-------------------------------------|
| 1            | 0.0018                              | 50           | 49.44                               |
| 5            | 0.0175                              | 55           | 164.9                               |
| 10           | 0.0470                              | 60           | 189.0                               |
| 15           | 0.0950                              | 65           | 204.4                               |
| 30           | 0.1845                              | 70           | 331.6                               |
| 25           | 0.3709                              | 75           | 385.9                               |
| 30           | 0.9648                              | 80           | 521.6                               |
| 35           | 8.653                               | 85           | 687.4                               |
| 40           | 22.85                               | 90           | 750.7                               |
| 45           | 36.18                               | 100          | 783.9                               |

71

72

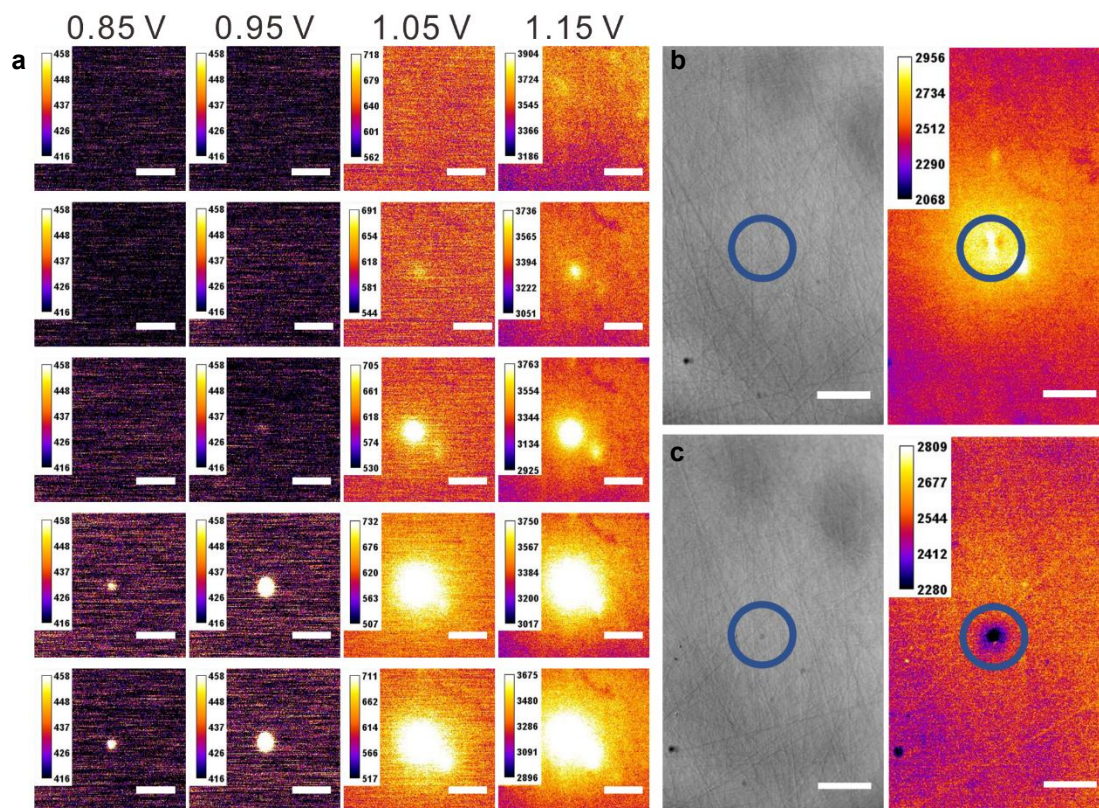

73

74 **Figure S1.** (a) HT-ECL images of different laser power density at the applied potential from 0.85 V to 1.15 V, scan rate: 10 mV/s. The  
 75 corresponding laser power densities of the images from top to bottom are 0.9648 (30 mA), 8.653 (35 mA), 22.85 (40 mA), 36.18 (45 mA),  
 76 49.44 (50 mA)  $\mu\text{W}/\mu\text{m}^2$ , respectively. The electrolyte is 10 mM PBS solution (pH 7.4) containing 1 mM  $\text{Ru}(\text{bpy})_3^{2+}$  and 100 mM TPrA.  
 77 Exposure time: 200 ms. Scale bar (white) is 10  $\mu\text{m}$ . (b) The BF image (left) and the HT-ECL image (right) at the constant potential of 1.2 V  
 78 with the laser power density of 164.9  $\mu\text{W}/\mu\text{m}^2$  (55 mA). The electrolyte is the same as that in (a). Exposure time: 200 ms. Scale bar (white)  
 79 is 20  $\mu\text{m}$ . (c) The BF image (left) and the ECL image at 1.2 V (right) after illuminated by the power density of 189.0  $\mu\text{W}/\mu\text{m}^2$  (60 mA). At  
 80 this time, the laser region showing a black burn mark during the ECL process, which could also be noticed in BF. Exposure time: 200 ms.  
 81 Scale bar (white) is 20  $\mu\text{m}$ .

82

83 **Table S2.** The gain under the laser power from 30 mA 0.9648 ( $\mu\text{W}/\mu\text{m}^2$ ) to 50 mA (49.44  $\mu\text{W}/\mu\text{m}^2$ ) at 0.95 V

| Laser current (mA) | 30 | 35 | 40   | 45    | 50    |
|--------------------|----|----|------|-------|-------|
| Gain               | /  | /  | 1.74 | 31.91 | 63.75 |

84

85

86 As shown in Figure S1 and table S2, when the power density of laser was 0.9648  $\mu\text{W}/\mu\text{m}^2$  (30 mA), the HT-ECL did not happen.  
 87 The HT-ECL could be observed when laser power increased to 8.653 and 22.85  $\mu\text{W}/\mu\text{m}^2$  (35 and 40 mA), but the potential advance  
 88 was absence at this time. When the power density reached 36.18  $\mu\text{W}/\mu\text{m}^2$  (45 mA) and 49.44  $\mu\text{W}/\mu\text{m}^2$  (50 mA), HT-ECL  
 89 phenomenon of enhancing local ECL intensity and advancing trigger ECL potential could be discovered. However, when the power  
 90 density was over 164.9  $\mu\text{W}/\mu\text{m}^2$  (55 mA), the HT-ECL region appeared black spots, implying the possibility to damage the GCE  
 91 surface. At this time, the region burned by laser could not be seen in BF image. But when power density achieved 189.0  $\mu\text{W}/\mu\text{m}^2$   
 92 (60 mA), the burn mark could be clearly identified in BF images. Based on this optimization, we chose 36.18 to 49.44  $\mu\text{W}/\mu\text{m}^2$  (45  
 93 to 50 mA) as experimental power density. Noted, all the power density below 331.6  $\mu\text{W}/\mu\text{m}^2$  (70 mA) could not be collected by  
 94 EMCCD camera with the exposure time of 200 ms.

95

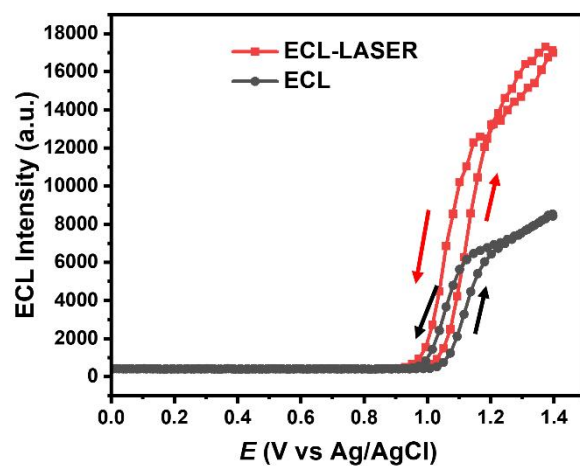

96

97 **Figure S2.** ECL and HT-ECL-potential curves in 10 mM PBS solution (pH 7.4) containing 1 mM Ru(bpy)<sub>3</sub><sup>2+</sup> and 100 mM TPrA. Scan  
 98 range from 0 V to 1.4 V, and scan rate: 10 mV/s.

99 As shown in Figure S2, the HT-ECL exhibited the higher ECL emission during applying potential from 0 to 1.4 V.

100

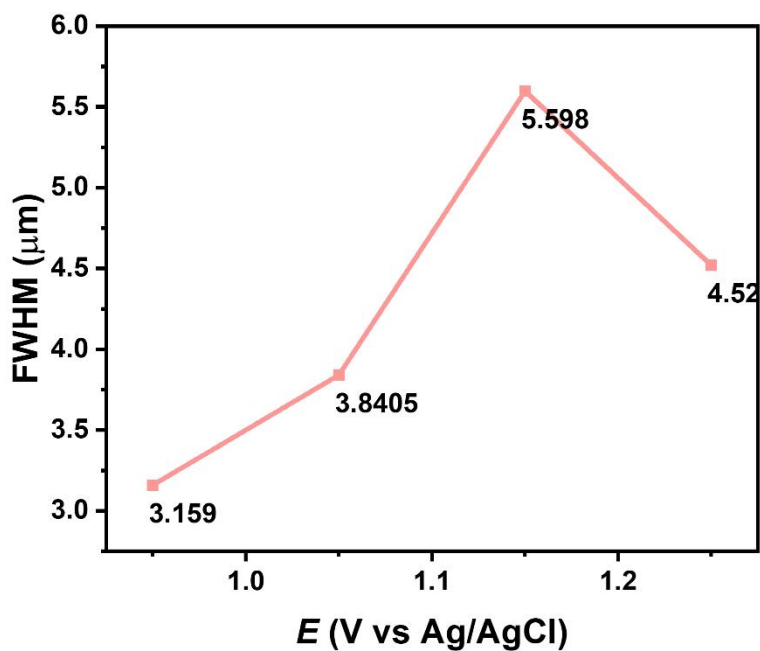

101

102 **Figure S3.** The FWHM varies as the voltage changes.

103

104

105

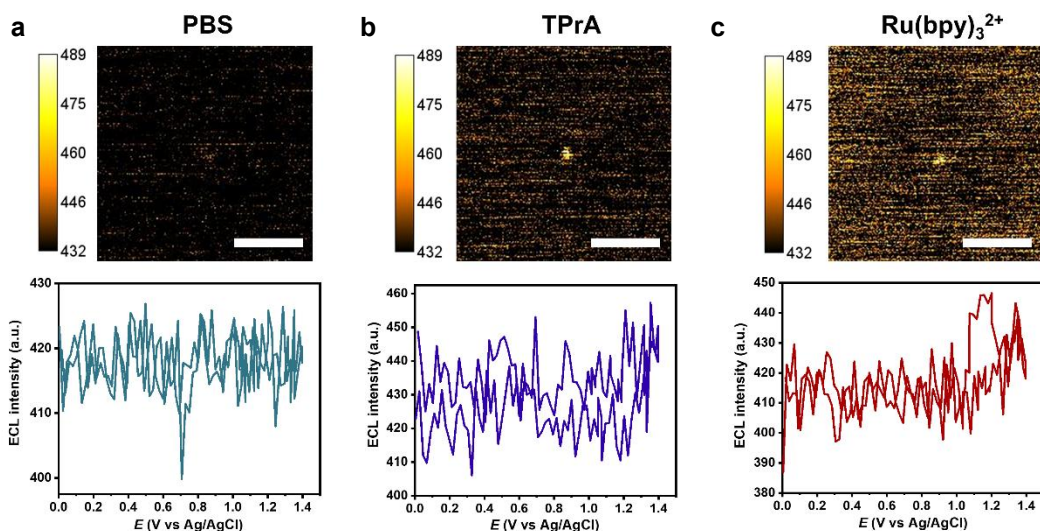

106

107 **Figure S4.** The corresponding laser spot images and intensity curves along the radius of laser spot in 10 mM PBS (a), 100 mM TPrA (b), 1  
 108 mM Ru(bpy)<sub>3</sub><sup>2+</sup> (c), respectively. The applied potential was cyclically from 0 V to 1.4 V at the scan rate of 10 mV/s. Scale bar (white) is 20  
 109 μm. Exposure time: 200 ms.

110

111

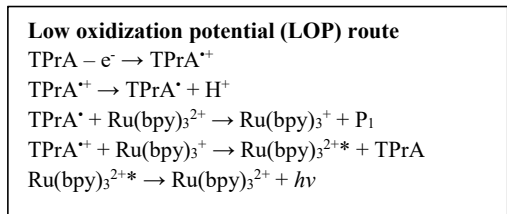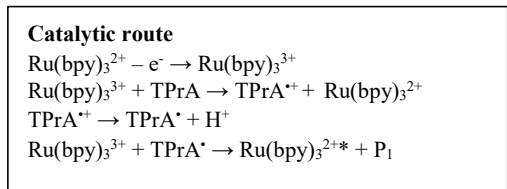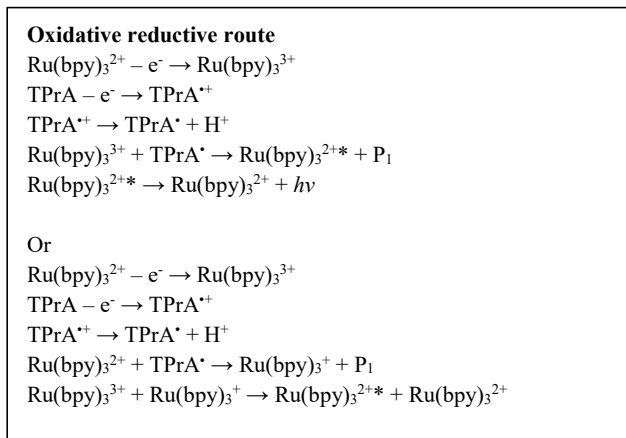

112 **Scheme S1.** Typical routes for ECL reactions in Ru(bpy)<sub>3</sub><sup>2+</sup> and TPrA as coreactant. For the CEM cells labeling experiment, the  
 113 LOP reaction route dominates. P<sub>1</sub> is short for Pr<sub>2</sub>N<sup>+</sup>=CHCH<sub>2</sub>CH<sub>3</sub>.

114

115



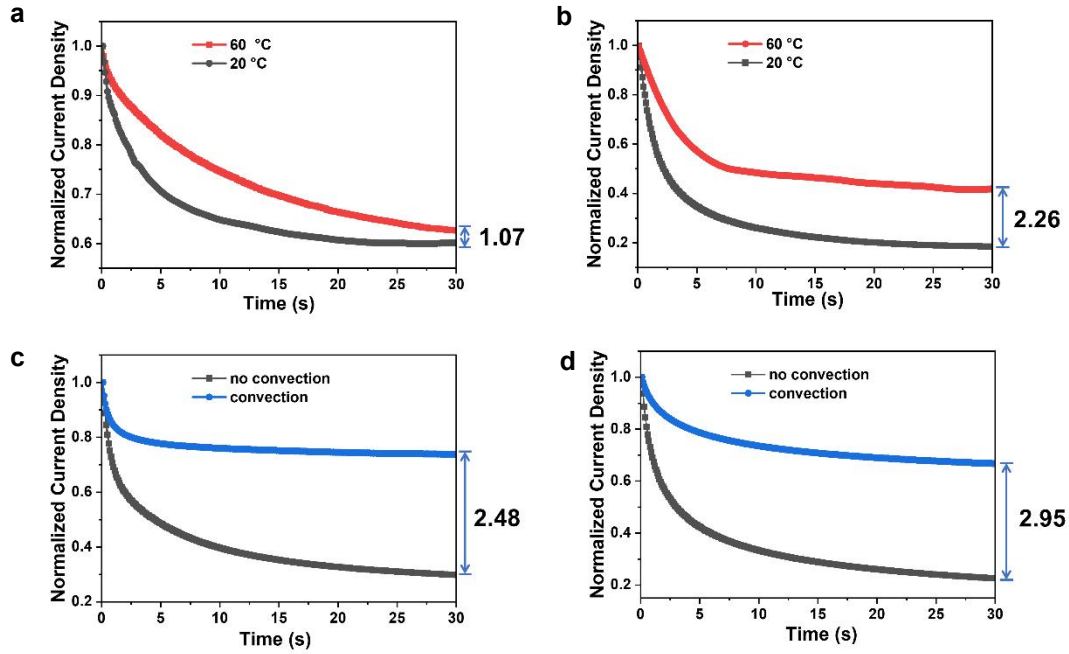

116

117 **Figure S5.** (a)-(b) The normalized current density diagrams of Ru(bpy)<sub>3</sub><sup>2+</sup> (a), TPrA (b) at 60°C and 20 °C. (c)-(d) The normalized current  
 118 density of Ru(bpy)<sub>3</sub><sup>2+</sup> (c), TPrA (d) without and with convection speed of 1314 rpm. The applied potential was 1.3 V.

119 According to the direct observation of thermal convection (refer to main text, Figure 3), we estimated the convection speed at the place of  
 120 10 μm around the laser spot is 8.23 μm/s. The convection speeds of rotating disk electrode (RDE) are described as<sup>5</sup>:

$$121 \quad v_y = -0.51\omega^{3/2}v^{-1/2}y^2 \quad (\text{eq S1})$$

$$122 \quad v_r = 0.51\omega^{3/2}v^{-1/2}ry \quad (\text{eq S2})$$

123 Where  $v_y$  is the speed in the vertical direction,  $v_r$  is the radial velocity,  $y$  is the vertical distance and  $r$  is the radial distance to the center of  
 124 the disk, and  $\omega$  is the angular velocity or rotation speed of the disk.  $\nu$  for water is 0.01 cm<sup>2</sup>/s. Here, we assumed  $y=1 \mu\text{m}$  and  $r=10 \mu\text{m}$ . By  
 125 substituting  $v_r=8.23 \mu\text{m/s}$  into eq S2, the corresponding  $\omega$  can be determined as 137.6 s<sup>-1</sup>. Thus, the rotation speed  $n=\omega/2 \pi$  was calculated  
 126 as 21.9 r/s, equivalent to 1314 rpm.

127

## 128 COMSOL simulation

129 COMSOL Multiphysics (Version 5.6) was employed to simulate the locally heating process and the ECL changing related to  
 130 temperature gradient. The whole digital simulation was divided into two parts: Heat transfer process and the ECL reaction process.

131 For the heat transfer process, the incident heat flux from laser was modeled as the heat source distributed on the electrode surface.  
 132 A set of variables were introduced to define the Gaussian distribution of the heat load around the irradiation place (eq S3).  
 133 Assuming that good thermal isolation from the environment was achieved and the ambient temperature was 20 °C, and the  
 134 absorptivity equaled emissivity, thus the heat load from laser needed to multiply the emissivity (eq S4). Also, assuming that the  
 135 electrode was not transparent at the wavelength of laser, all the heat generated by laser was deposited on the surface. The power  
 136 density of laser was according to table S1, choosing 36.18 μW/μm<sup>2</sup> (45 mA) as representative. The radius of laser spot ( $r_{\text{spot}}$ ) was  
 137 measured as 3.25 μm by ECLM. The emissivity of glassy carbon was referenced to the previous paper.<sup>6</sup>

$$138 \quad \text{Flux} = ((2 \cdot p_{\text{laser}})/(\pi \cdot r_{\text{spot}}^2)) \cdot \exp(- (2 \cdot r_{\text{focus}}^2)/r_{\text{spot}}^2) \quad (\text{eq S3})$$

139  $r_{\text{focus}}$  represented for the distance to the laser irradiation place, the value of  $p_{\text{laser}}$  could be found in table S3.

$$140 \quad Q = \text{emissivity} \cdot \text{Flux} \quad (\text{eq S4})$$

141 “Heat transfer in solids” physical field was used for modeling the process of laser locally heating the electrode. In this physical  
 142 field, the conductive heat flux  $q$  could be described by Fourier’s law as below, proportional to the temperature gradient:



$$q = -k\nabla T$$

143 For the time-dependent study, the temperature field in the immobile solids followed the heat equation:

$$\rho C_p \frac{\partial T}{\partial t} = \nabla \cdot (k\nabla T) + Q$$

144 **Table S3. Parameters of heat transfer process.**

| Name       | Value                   | Description                             |
|------------|-------------------------|-----------------------------------------|
| r_spot     | 3.25*10 <sup>-6</sup> m | The radius of laser spot                |
| emissivity | 0.8                     | The surface emissivity of glassy carbon |
| p_laser    | 0.0012 W                | The laser power                         |

145

146 Subsequently, the laminar flow module coupling with gravity field was added to simulate the heat conduction. As shown in  
147 Figure S9, it is sufficient to cause heat convection near the electrode surface at this temperature difference.

148 For the ECL reaction process, only the main ECL routes were considered due to the complicated mechanisms. The reaction  
149 equations are as follows:

150 Heterogeneous electron transfer reactions:

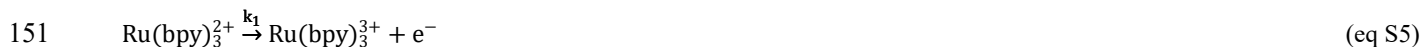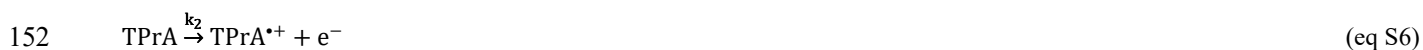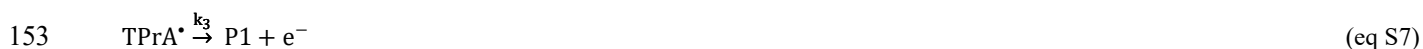

154 Homogeneous reactions:

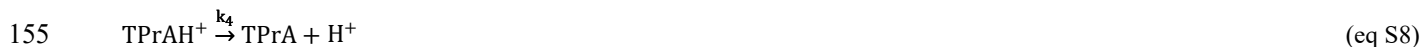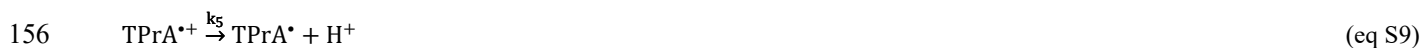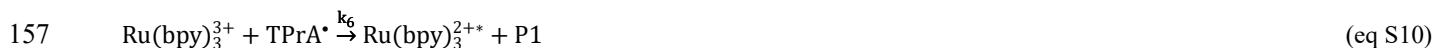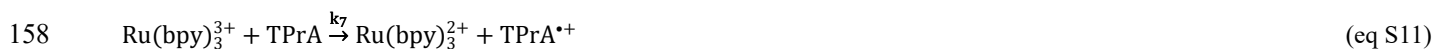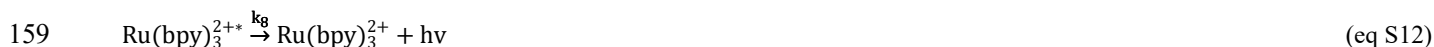

160

161

162 **Table S4. The reaction rates of ECL process.**

| Domain                                        | Name | Value                                   | Description              |
|-----------------------------------------------|------|-----------------------------------------|--------------------------|
| Electrode surface<br>(heterogeneous reaction) | k1   | 15 cm/s                                 | Rate constant of eq. S5  |
|                                               | k2   | 10 <sup>-4</sup> m/s                    | Rate constant of eq. S6  |
|                                               | k3   | 10 <sup>-4</sup> m/s                    | Rate constant of eq. S7  |
| Electrolyte<br>(homogeneous reaction)         | k4   | 8 1/s                                   | Rate constant of eq. S8  |
|                                               | k5   | 3500 1/s                                | Rate constant of eq. S9  |
|                                               | k6   | 10 <sup>6</sup> m <sup>3</sup> /(s*mol) | Rate constant of eq. S10 |
|                                               | k7   | 13 m <sup>3</sup> /(s*mol)              | Rate constant of eq. S11 |

|  |    |         |                          |
|--|----|---------|--------------------------|
|  | k8 | 300 1/s | Rate constant of eq. S12 |
|--|----|---------|--------------------------|

163

164 “Transport of Diluted Species” physical field was chosen to simulate the ECL process. In this physical field, the time-dependent  
165 transport of dilute species followed the equation below:

$$\nabla \cdot (-D_i \nabla c_i) + \mathbf{u} \cdot \nabla c_i = R_i$$

166 As mentioned before, the ECL reactions could be divided into two categories: heterogeneous electron transfer reactions on the  
167 electrode surface and the homogeneous reactions in the electrolyte domain. The effect of temperature would be discussed following  
168 this classification.

169 On the electrode surface, the flux (J) boundaries could be simulated as:

$$170 \quad J_{Ru^{2+}} = -J_{Ru^{3+}} = -k_1 [Ru^{2+}] \quad (\text{eq S13})$$

$$171 \quad J_{TPrA} = -J_{TPrA^{*+}} = -k_2 [TPrA] \quad (\text{eq S14})$$

$$172 \quad J_{TPrA^*} = -J_{P1} = -k_3 [TPrA^*] \quad (\text{eq S15})$$

173 where  $[Ru^{2+}]$ ,  $[TPrA]$  and  $[TPrA^*]$  are the concentrations of  $Ru(bpy)_3^{2+}$ ,  $TPrA$  and  $TPrA^*$ , respectively.

174 According to Butler-Volmer equation,<sup>7</sup> the reaction rates on the electrode could be written as:

$$175 \quad k = k^0 \exp[(1 - \alpha)(E - E^0)F/RT] \quad (\text{eq S16})$$

176 Where  $k^0$  denotes for the standard rate constant,  $E$  the electrode potential set as 1.2 V,  $E^0$  the formal potential which is 1.05 V for  
177  $Ru(bpy)_3^{2+}/Ru(bpy)_3^{3+}$  and 0.90 V for  $TPrA$  oxidation.  $\alpha$  is the transfer coefficient, which is taken as 0.5, and the other parameters  
178 are:  $R=8.31 \text{ J/(kmol)}$ ,  $F=96485 \text{ C/mol}$ . In this equation, the electrode reactions could be linked to the temperature since  $k_1$  at  $T_1 =$   
179  $293 \text{ K}$  was found in previous reports.<sup>8</sup> Thus, it could be deduced as eq S16. By adding the interpolation function, the correlation  
180 with temperature could be achieved.

$$181 \quad k = k_1 \exp \left[ (1 - \alpha)(E - E^0) \left( \frac{1}{T} - \frac{1}{T_1} \right) F/R \right] \quad (\text{eq S17})$$

182

183 In the electrolyte domain, if temporarily disregarding the effect of convection, the transition of all ECL species followed the  
184 Fick's second law:

$$185 \quad \frac{\partial c_i}{\partial t} = D_i \nabla^2 c_i \quad (\text{eq S18})$$

186 Thus, the concentration change of ECL species could be described in the following form (table S5):

187

188 **Table S5. The time-dependent concentration changes of ECL species.**

| Description                             | Expression                                                                                                             |
|-----------------------------------------|------------------------------------------------------------------------------------------------------------------------|
| The concentration change of $Ru^{3+}$   | $\frac{\partial [Ru^{3+}]}{\partial t} = D_{Ru^{3+}} \Delta [Ru^{3+}] - k_6 [Ru^{3+}] [TPrA^*] - k_7 [Ru^{3+}] [TPrA]$ |
| The concentration change of $Ru^{2+}$   | $\frac{\partial [Ru^{2+}]}{\partial t} = D_{Ru^{2+}} \Delta [Ru^{2+}] + k_7 [Ru^{3+}] [TPrA] + k_9 [Ru^{2+}]$          |
| The concentration change of $TPrA^*$    | $\frac{\partial [TPrA^*]}{\partial t} = D_{TPrA^*} \Delta [TPrA^*] + k_5 [TPrA^{*+}] - k_6 [Ru^{3+}] [TPrA^*]$         |
| The concentration change of $TPrA^{*+}$ | $\frac{\partial [TPrA^{*+}]}{\partial t} = D_{TPrA^{*+}} \Delta [TPrA^{*+}] - k_5 [TPrA^{*+}] + k_7 [TPrA] [Ru^{3+}]$  |

|                                               |                                                                                                                                          |
|-----------------------------------------------|------------------------------------------------------------------------------------------------------------------------------------------|
| The concentration change of TPrA              | $\frac{\partial[\text{TPrA}]}{\partial t} = D_{\text{TPrA}}\Delta[\text{TPrA}] - k_7[\text{TPrA}][\text{Ru}^{3+}] + k_4[\text{TPrAH}^+]$ |
| The concentration change of Ru <sup>2+*</sup> | $\frac{\partial[\text{Ru}^{2+*}]}{\partial t} = k_6[\text{Ru}^{3+}][\text{TPrA}^*] - k_8[\text{Ru}^{2+*}]$                               |

189

190 **Table S6. The parameters of ECL process.**

| Name   | Value                                    | Description                                                                            |
|--------|------------------------------------------|----------------------------------------------------------------------------------------|
| cRu0   | 1 mol/m <sup>3</sup>                     | Initial concentration of Ru(bpy) <sub>3</sub> <sup>2+</sup>                            |
| cTPrA0 | 100 mol/m <sup>3</sup>                   | Initial concentration of TPrA                                                          |
| cH0    | 3.98*10 <sup>-5</sup> mol/m <sup>3</sup> | Initial concentration of H <sup>+</sup>                                                |
| cBuf0  | 200 mol/m <sup>3</sup>                   | Initial concentration of buffer                                                        |
| DRu    | 5.9*10 <sup>-9</sup> m <sup>2</sup> /s   | Diffusion coefficient of Ru(bpy) <sub>3</sub> <sup>2+</sup> and its derivative at 20°C |
| DTPrA  | 5*10 <sup>-9</sup> m <sup>2</sup> /s     | Diffusion coefficient of TPrA and its derivative at 20°C                               |
| DH     | 5*10 <sup>-9</sup> m <sup>2</sup> /s     | Diffusion coefficient of H <sup>+</sup> at 20°C                                        |
| DBuf   | 5*10 <sup>-10</sup> m <sup>2</sup> /s    | Diffusion coefficient of buffer at 20°C                                                |

191

192 For the homogeneous reactions, when the temperature changed, both the diffusion coefficient and reaction rates would change.  
 193 However, the ECL layer was mainly diffusion-controlled shown by the simulation. When changing the diffusion coefficients, the  
 194 change of ECL layer would be great enough to neglect the change of reaction rates. Thus, the relationship between temperature and  
 195 diffusion coefficients (*D*) was the main consideration. According to Stokes-Einstein equation (eq S19), the change extent of *D* with  
 196 temperature should be all the same for ECL species.

$$197 \quad D = kT/6\pi r_i \mathbf{u} \quad (\text{eq S19})$$

198 where *k* represents for Boltzmann's constant, *r<sub>i</sub>* is the radius of the diffusing species, and *u* is the viscosity of the solution.

199 Referring to the previous reports<sup>9</sup>, we derived the change magnitude of diffusion coefficient using 20 °C (known data) as the base  
 200 (table S7). Likewise, the relationship with temperature could be obtained by setting the interpolation functions according to the data  
 201 in table S7.

202

203 **Table S7. The change extent of diffusion coefficient with temperature.**

| Temperature (°C) | 20 | 30   | 40   | 50   | 60   | 65   |
|------------------|----|------|------|------|------|------|
| Change extent    | 1  | 1.62 | 2.44 | 2.98 | 4.32 | 4.87 |

204 Next, we constructed a 2D axisymmetric geometry (Figure S6), assuming the transport behavior happened vertically above the  
 205 electrode surface. The mesh setting was extremely fine as shown in Figure S7. As a result, we could obtain the simulation of  
 206 temperature effect on ECL process without considering the heat convection, which could be found in the main article.

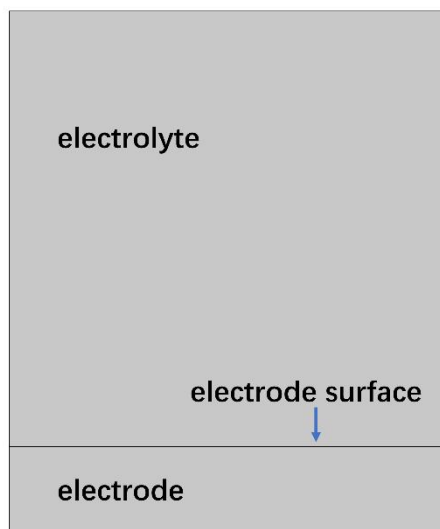

207

208 **Figure S6.** The geometry construction in COMSOL simulation

209

210

211

212

213

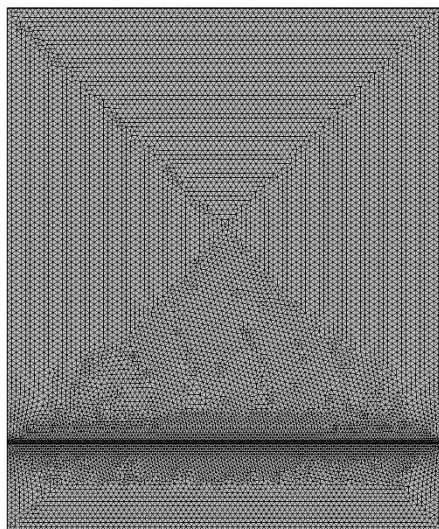

214

215 **Figure S7.** The mesh setting in COMSOL simulation

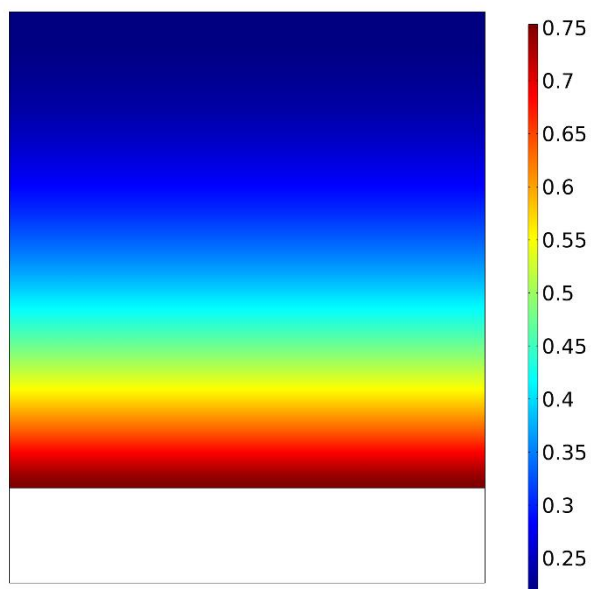

216

217 **Figure S8.** The Side view image of  $\text{Ru}(\text{bpy})_3^{2+*}$  simulated by COMSOL before considering temperature gradient

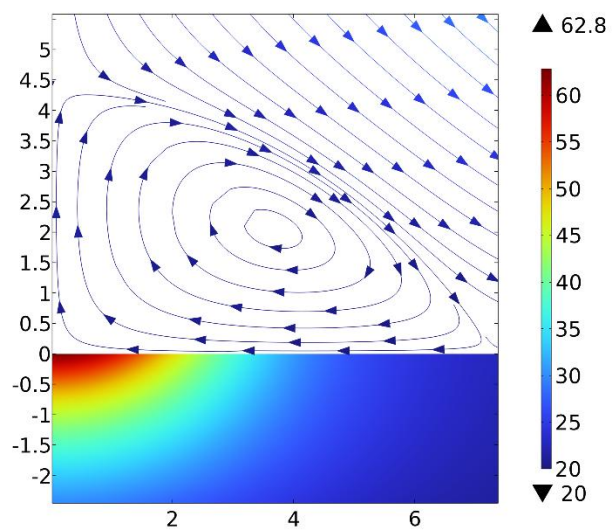

218

219 **Figure S9.** The heat convection simulated by COMSOL. The color bar indicates the heat difference on the electrode surface.

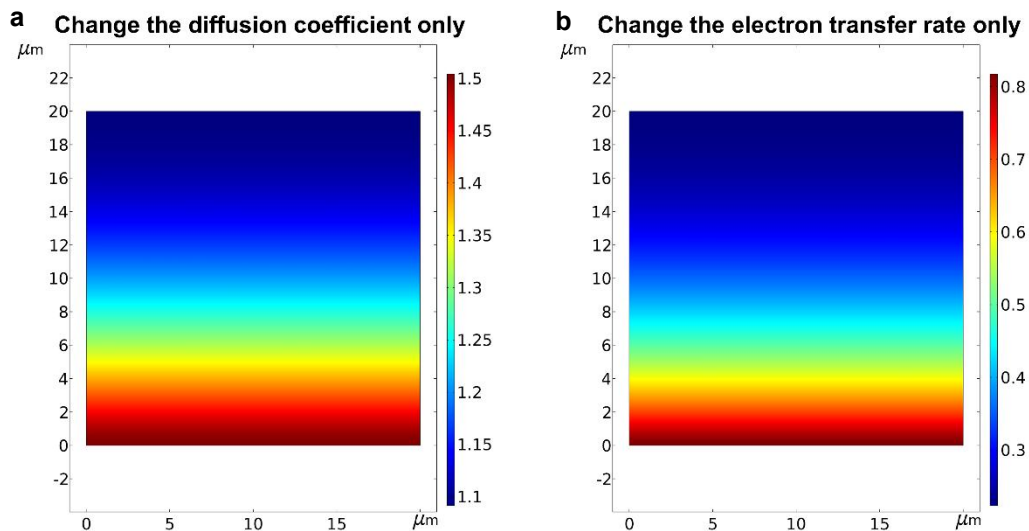

220

221

222

223

224

**Figure S10.** The comparison of simulated  $\text{Ru}(\text{bpy})_3^{2+*}$  distribution between only change the diffusion coefficient at  $60\text{ }^\circ\text{C}$  (a) and only change the electron transfer rates at  $60\text{ }^\circ\text{C}$  (b).

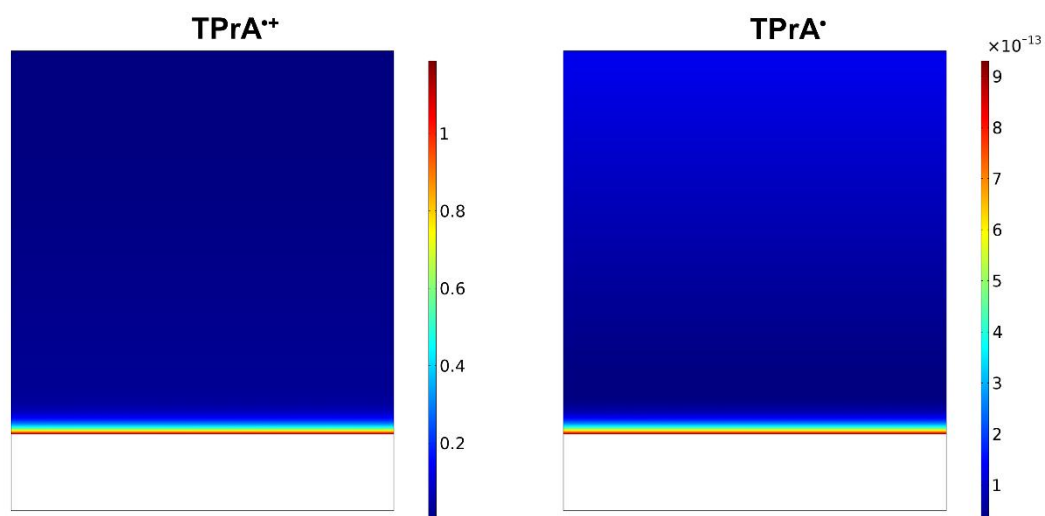

225

226

227

**Figure S11.** The concentration of  $\text{TPrA}^{+}$  and  $\text{TPrA}^*$  species by COMSOL simulation before considering temperature gradient.

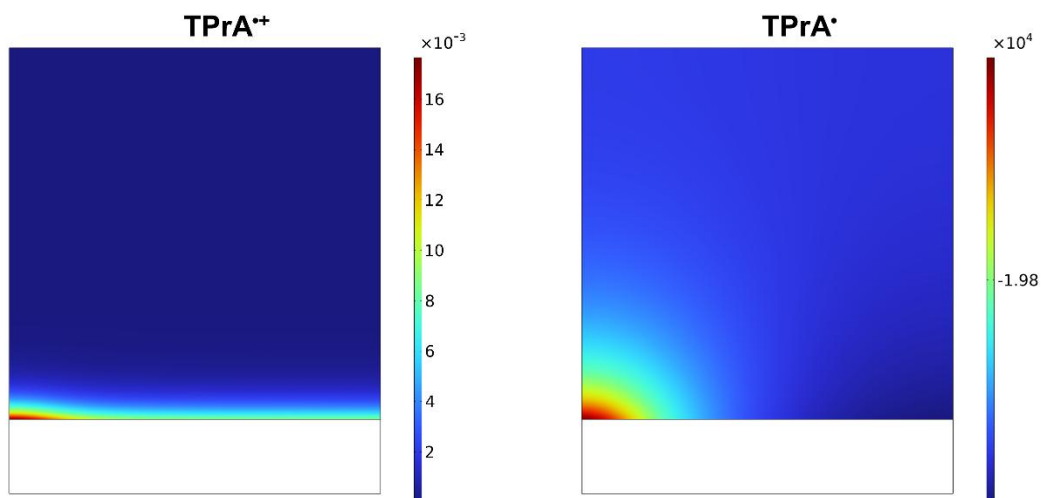

228

229 **Figure S12.** The concentration of TPrA<sup>++</sup> and TPrA<sup>\*</sup> species by COMSOL simulation after considering temperature gradient

230

231

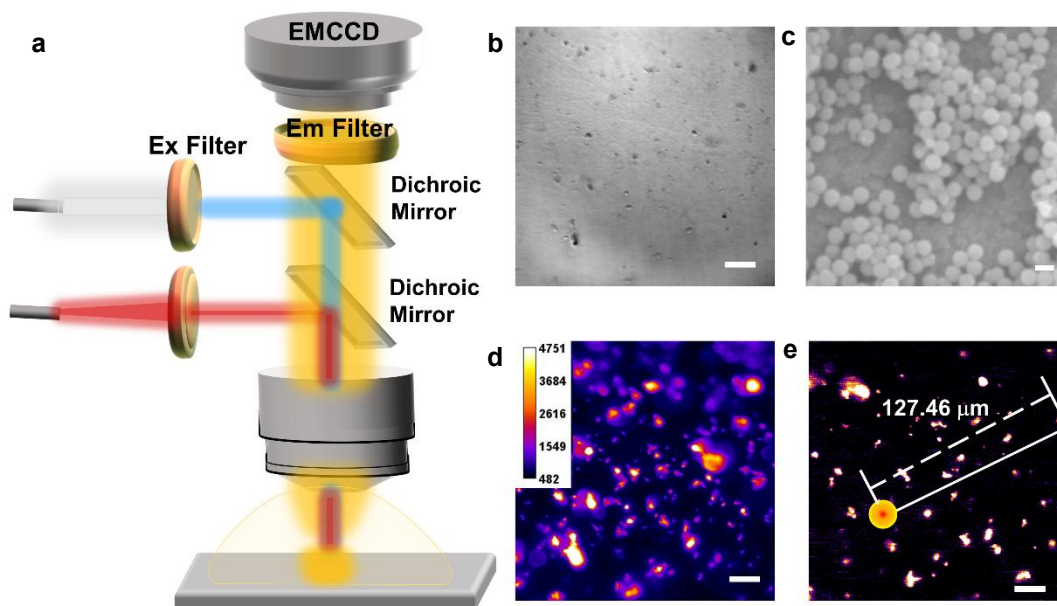

232

233 **Figure S13.** (a) Schematic illustration of the fluorescence collection setup based on ECL microscopy. The lower dichroic mirror could focus  
 234 the 730 nm laser on the electrode surface. The upper dichroic mirror changes the light source (LED flashlight) into the FL excitation  
 235 wavelength of RuDSN and allows the FL to penetrate. (b,d) The corresponding BF image (b) and FL image (d) of RuDSN. Scale bar  
 236 (white) is 20 μm. Exposure time is 10 ms. (c) SEM image of RuDSN. Scale bar (white) is 100 nm. (e) The longest influence range  
 237 observed of thermal convection is over 127.46 μm. Scale bar (white) is 20 μm. Exposure time is 10 ms.

238 The SEM image (Figure S13c) of RuDSN displayed nanospheres of good uniformity. The corresponding BF image (Figure S13b)  
 239 and FL image (Figure S13d) indicated the successful doping of Ru(bpy)<sub>3</sub><sup>2+</sup> and availability of visualizing thermal convection. The  
 240 size of RuDSN was around 100 nm in the SEM image, however, inevitable reunion resulted in a bigger size of bright spot in BF and  
 241 FL images, having no effect on the experimental phenomenon. The detailed microscopy setup for FL images could be seen at  
 242 experimental section.



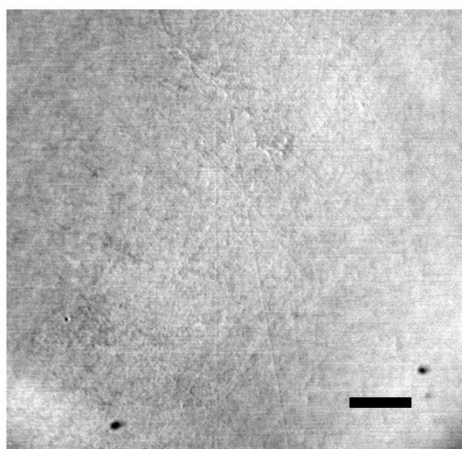

243  
244 **Figure S14.** The BF image of Nafion film modified on GCE. Scale bar (black) is 20  $\mu\text{m}$ .

245  
246 As seen in Figure S14, the roughness increased compared with the bare GCE, indicating the successful modification of Nafion on  
247 GCE surface.

248  
249

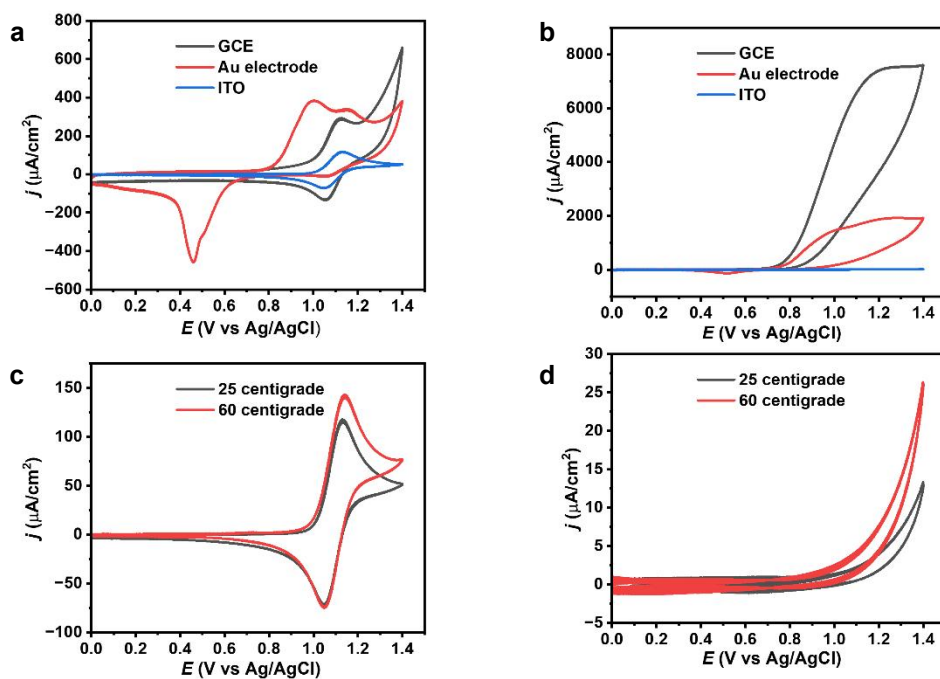

250  
251 **Figure S15.** (a) Current density-potential curves of 1 mM  $\text{Ru}(\text{bpy})_3^{2+}$  on GCE, Au electrode, ITO, respectively. (b) Current density-  
252 potential curves of 1mM TPrA on GCE, Au electrode, ITO, respectively. (c) Current density-potential curves of 1 mM  $\text{Ru}(\text{bpy})_3^{2+}$  on ITO  
253 at 25  $^\circ\text{C}$ , 60  $^\circ\text{C}$ , respectively. (d) Current density-potential curves of 1 mM TPrA on ITO at 25  $^\circ\text{C}$ , 60  $^\circ\text{C}$ , respectively. The imposed  
254 potential was cyclically from 0 V to 1.4 V at the scan rate of 10 mV/s.

255 It is necessary to understand the distinguish between inner-sphere and outer-sphere electron transfer at electrodes, which adopted  
256 from the origin of electron transfer of coordination compounds. To be specific, the inner-sphere electron reactions require a sharing

257 ion ligand between active compounds, while the “outer-sphere” denotes a reaction between two species in which the original  
 258 coordination spheres are still maintained. Likewise, the outer-sphere electrode reactions usually take place at the outer Helmholtz  
 259 plane (OHP) separated by at least a solvent layer from the electrode surface, while the inner-sphere electrode reactions at the inner  
 260 Helmholtz plane (IHP) through a ligand absorbed on the electrode surface. Thus, the inner-sphere electrode reactions should be  
 261 more dependent on the electrode materials than the outer-sphere electrode reactions. The previous papers have already indicated the  
 262 oxidation of  $\text{Ru}(\text{bpy})_3^{2+}$  is indeed an outer-sphere electrode reaction.<sup>10,11</sup> We also performed several experiments to confirm the  
 263 different electron transfer types. First, when changing the electrode from GCE to gold electrode or ITO, it can be seen in Figure  
 264 S15a, 15b that the oxidation current density of  $\text{Ru}(\text{bpy})_3^{2+}$  became 1.15 times and 0.32 times than GCE, respectively. The degree  
 265 of change is much lower than that of TPrA, which the oxidation current density was 0.25 times on gold electrode and 0.0017  
 266 times on ITO than GCE, respectively. Moreover, we elevated the temperature of ITO to 60 °C. Figure S15c, 15d clearly indicated  
 267 that the increment in temperature can increase the oxidation current density of  $\text{Ru}(\text{bpy})_3^{2+}$  to 1.32 times the original, while that of  
 268 TPrA was 2.03 times, also implying  $\text{Ru}(\text{bpy})_3^{2+}$  is less susceptible to electrodes than TPrA.

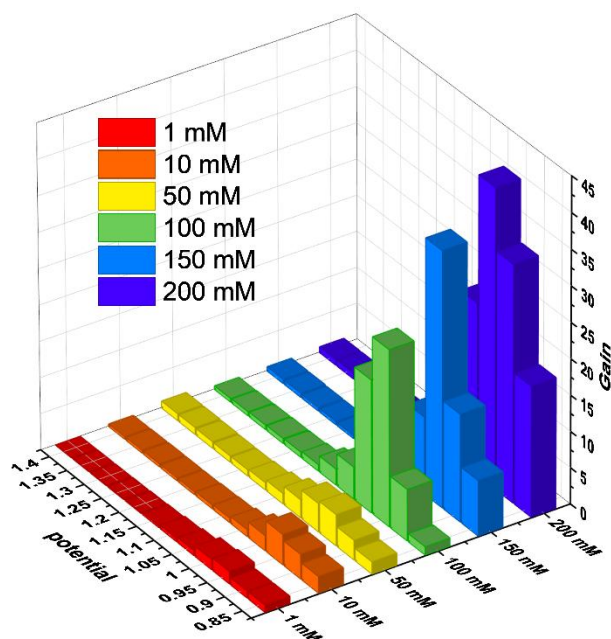

269

270 **Figure S16.** Histogram of gain as a function of applied voltage and TPrA concentration. The applied voltage is from 0 V to 1.4 V at the  
 271 scan rate of 10 mV/s. The concentration of  $\text{Ru}(\text{bpy})_3^{2+}$  remains 1 mM.

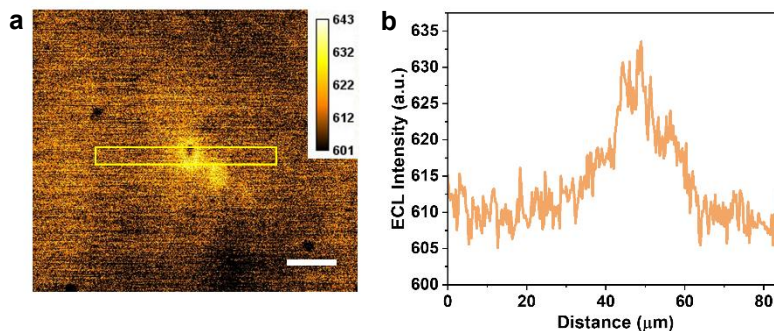

272

273 **Figure S17.** (a) The HT-ECL graph of free NCDs and 1 mM  $\text{Ru}(\text{bpy})_3^{2+}$  at 1.4 V. (b) The ECL intensity along the yellow block in (a).

274

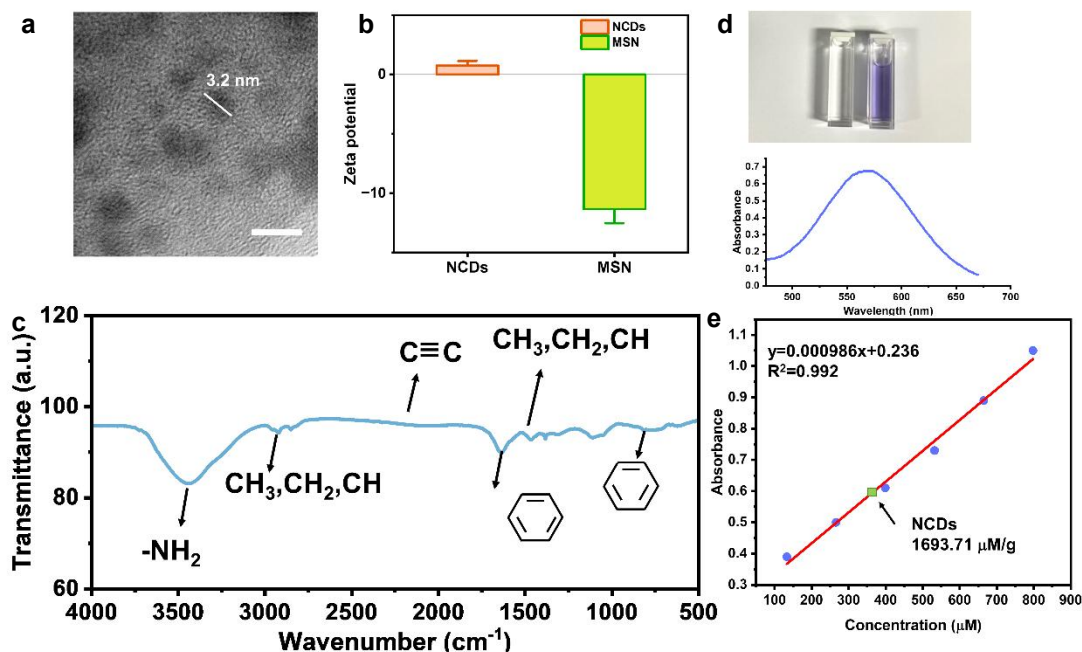

275

276 **Figure S18.** (a) HRTEM image of NCDs. The representative size of NCDs is 3.2 nm. Scale bar (white) is 5 nm. (b) Zeta potential  
 277 histogram of NCDs and MSN. (c) FT-IR graph of NCDs. (d) The absorbance at 570 nm of Kaiser agent for determining the contents of  
 278 amino groups in NCDs. Top: The comparison between Kaiser agent (left) and NCDs (right) after reacting with Kaiser agent. Bottom: The  
 279 absorbance spectra of NCDs with Kaiser agent. (e) The standard curve of amino contents determined by Kaiser agent and glycine. The  
 280 green square indicates the amino content of NCDs, which was calculated as 1693.71  $\mu\text{M/g}$ .

281

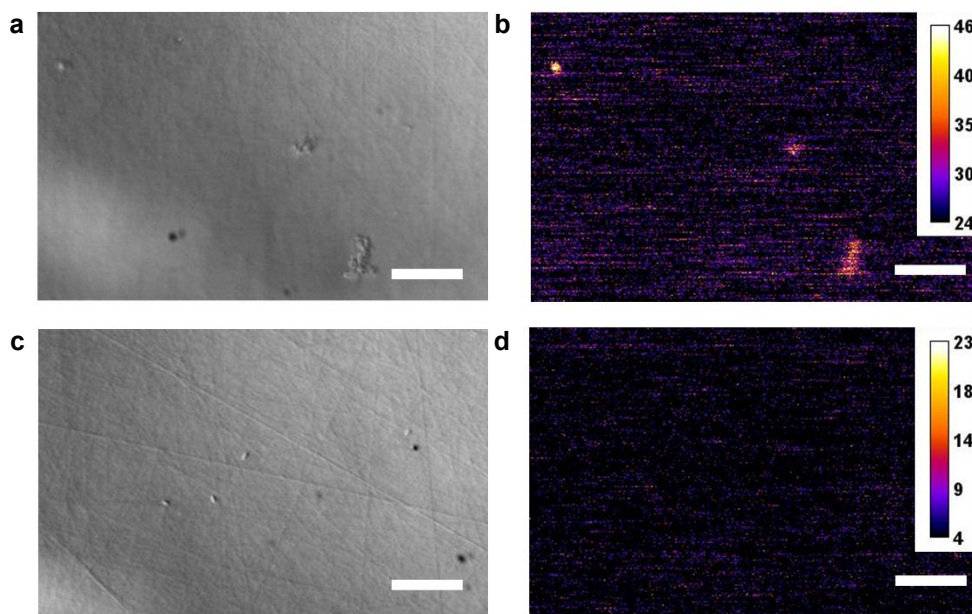

282

283 **Figure S19.** The corresponding BF image (a) and ECL image (b) of NCD/MSN. The corresponding BF image (c) and ECL image (d) of  
 284 only MSN. Scale bar (white) is 20  $\mu\text{m}$ . For ECL images, the exposure time is 500 ms, and the applied voltage is 1.2 V.

285

286 The FT-IR image of the synthetic NCDs was displayed in Figure S18c. The characteristic peaks of  $\text{C}\equiv\text{C}$  ( $2182.5\text{ cm}^{-1}$ ) and  
 287 aromatic ring ( $1632.9$  and  $767.0\text{ cm}^{-1}$ ), N-H ( $3442.8\text{ cm}^{-1}$ ) and C-H ( $2923.6$  and  $1463.7\text{ cm}^{-1}$ ) indicate the successful synthesis of

288 NCDs. Zeta potential was shown in Figure S18b, verifying the availability of electrostatic interaction between MSN and NCDs.  
 289 The amino contents of NCDs were determined as 1693.71  $\mu\text{M/g}$  by Kaiser agent (Figure S18e). According to the Stokes-Einstein  
 290 equation (eq. S19), the diffusion coefficient of NCDs can be obtained, where  $r_i$  is the representative size of NCDs (3.2 nm) and  $\eta$  is  
 291 1 mPa·s for water under 293 K. Thus,  $D$  for NCDs was calculated as  $6.7 \times 10^{-11}$  m<sup>2</sup>/s, while  $D$  for TPrA was  $5 \times 10^{-9}$  m<sup>2</sup>/s in this context.

292 Because the abundant amino groups contained in NCDs could act as coreactants for  $\text{Ru}(\text{bpy})_3^{2+}$ , the stable ECL emission of  
 293 NCDs/MSN was gained in Figure S19b, while no ECL emission could be shown in only MSN without available amino groups  
 294 (Figure S19d).

295 The possible mechanism of ECL emission between NCDs and  $\text{Ru}(\text{bpy})_3^{2+}$  could be represented below according to previous  
 296 work<sup>4</sup>:

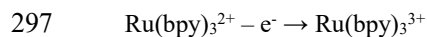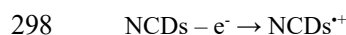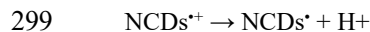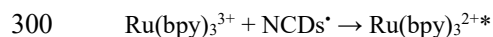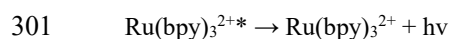

302

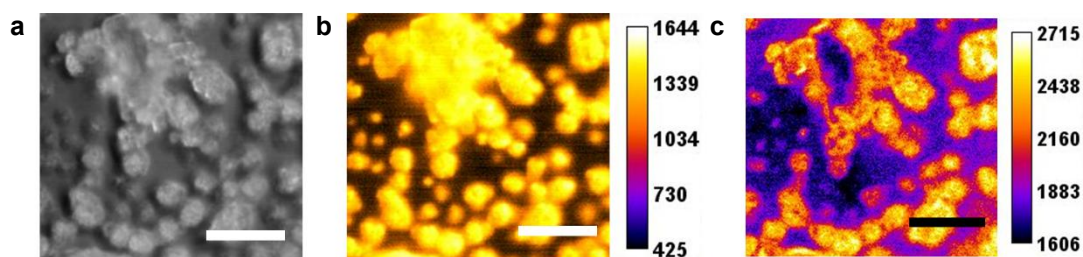

303

304 **Figure S20.** The corresponding BF image (a), FL image (b) and ECL image (c) of RuS. For FL image, the exposure time was 10 ms, and  
 305 for ECL image, the exposure time was 200 ms. Scale bar (white and black) is 20  $\mu\text{m}$ . For ECL image, the applied potential was 1.2 V.

306 To immobilize the luminophores, the RuS was prepared through a facile solvent evaporation method. Accordingly, a solution of  
 307 50 mM  $\text{Ru}(\text{bpy})_3(\text{PF}_6)_2$  in a mixed solvent of acetonitrile and n-propanol (5:1, v/v) was placed on the GCE surface. Then, RuS can  
 308 be obtained on the electrode surface after natural air-drying. The RuS still exhibited the highest ECL emission at 1.2 V. Based on  
 309 the previous report, the ECL pathway could be described below<sup>12</sup>:

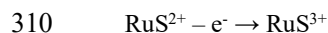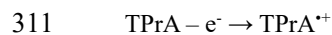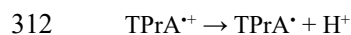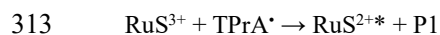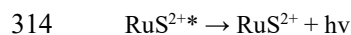

315

316

317

318



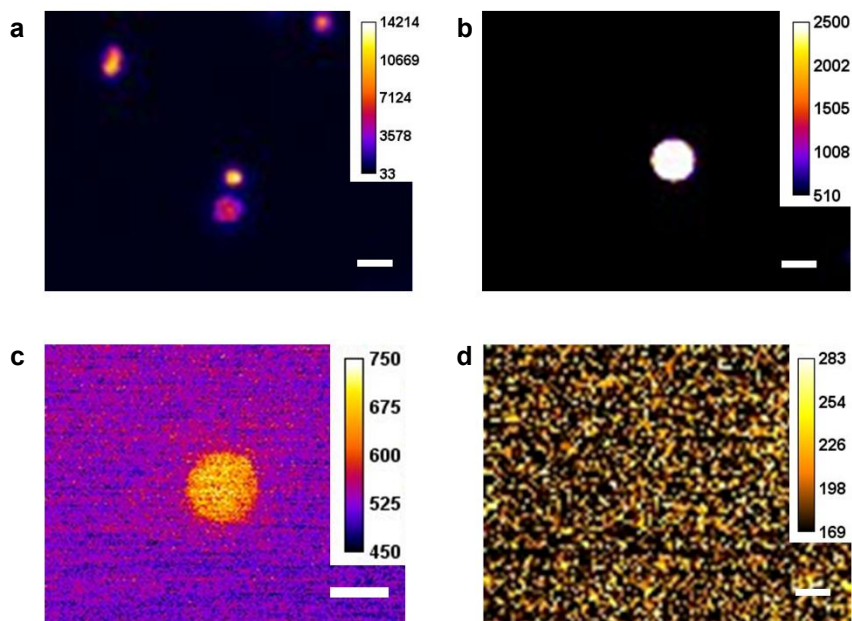

320

321 **Figure S21.** The corresponding FL images of Ru(bpy)<sub>3</sub><sup>2+</sup> labeled 1.5 μm SiO<sub>2</sub> beads (a), 5 μm SiO<sub>2</sub> bead (b) and 10 μm PS bead (c). Exposure time:  
 322 100 ms. Scale bar for (a), (b): 5 μm. Scale bar for (c): 10 μm. (d) The representative HT-ECL image at 0 V in 10 mM PBS (pH 7.4) containing 100  
 323 mM TPrA, indicating that the scatter of laser was not collected at camera parameters. Exposure time: 800 ms. Scale bar: 5 μm.

324

325

326

327

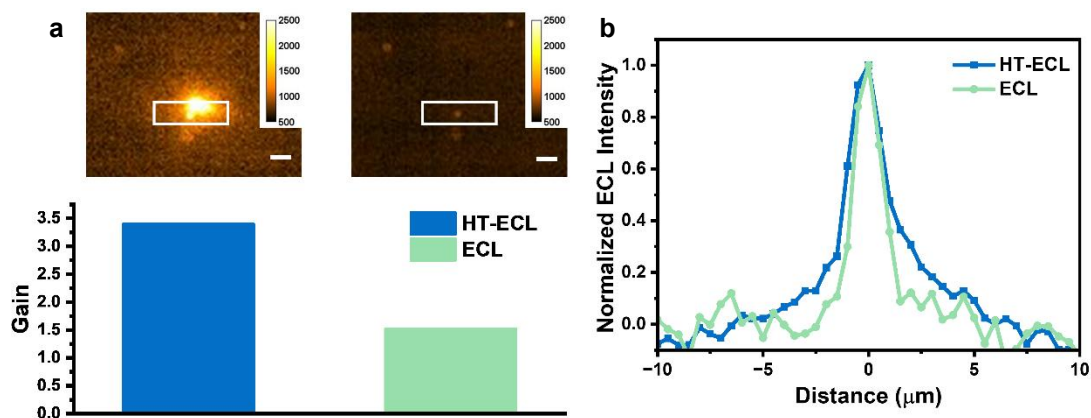

328

329 **Figure S22.** (a) Top: The corresponding HT-ECL image (left) and ECL image (right) for the same Ru(bpy)<sub>3</sub><sup>2+</sup> labeled 1.5 μm SiO<sub>2</sub> beads in 10 mM  
 330 PBS (pH 7.4) containing 100 mM TPrA. The HT-ECL at the blank region partially submerges the target bead. Applied voltage: 1.3 V. Exposure  
 331 time: 800 ms. Scale bar: 5 μm. Bottom: The corresponding HT-ECL and ECL gain for the target bead in the upper image. (b) The normalized ECL  
 332 intensity along the white rectangular in the top image of (a).

333

334

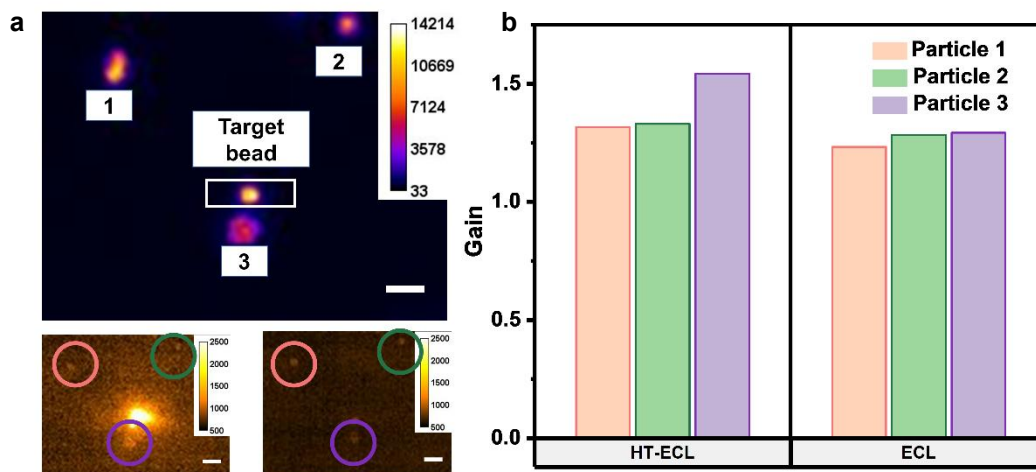

336

337 **Figure S23.** (a) Top: The FL image depicts 1.5  $\mu\text{m}$  SiO<sub>2</sub> beads labeled with Ru(bpy)<sub>3</sub><sup>2+</sup>, with particles designated as 1, 2, and 3 positioned around  
 338 the target bead. Bottom: The HT-ECL and ECL image of particle 1, 2, 3 in 10 mM PBS (pH 7.4) containing 100 mM TPrA. Applied voltage: 1.3 V.  
 339 Exposure time: 800 ms. Scale bar: 5  $\mu\text{m}$ . (b) The corresponding HT-ECL and ECL gain of particle 1, 2, and 3 in (a).

340

341

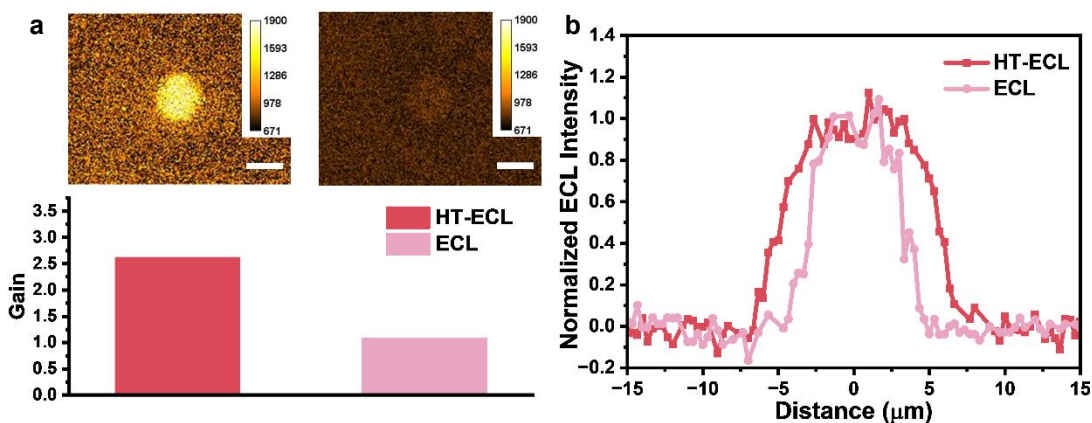

342

343 **Figure S24.** (a) Top: The corresponding HT-ECL image (left) and ECL image (right) for the same Ru(bpy)<sub>3</sub><sup>2+</sup> labeled 10  $\mu\text{m}$  PS bead in 10 mM  
 344 PBS (pH 7.4) containing 100 mM TPrA. Applied voltage: 1.3 V. Exposure time: 800 ms. Scale bar: 10  $\mu\text{m}$ . Bottom: The corresponding HT-ECL  
 345 and ECL gain for the target bead in the upper image. (b) The normalized ECL intensity along the radius of PS bead in (a).

346

347

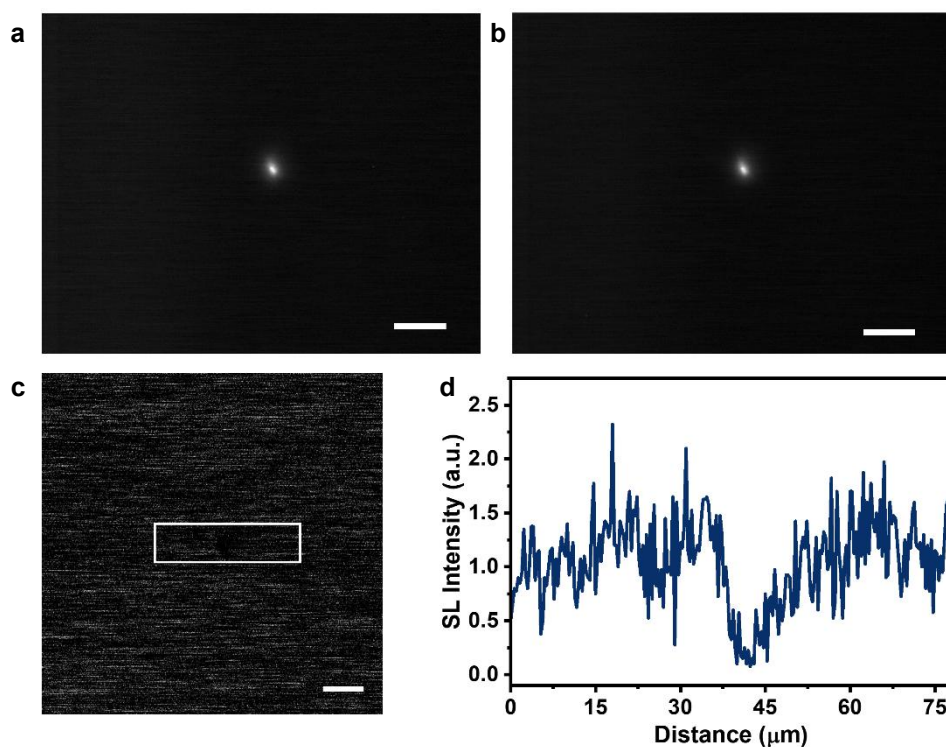

348

349 **Figure S25.** (a) The overlay image of original 20 SL images without potential applied. (b) The overlay image of original 20 SL images  
 350 when 1.4 V was applied. (c) Image obtained after subtracting (a) from (b). Scale bar (white) is 20 μm. Exposure time is 1 s. (d) The  
 351 intensity analysis along the white rectangular in (c).

352 Figure S25 displayed the scattering light of laser on no-labeling CEM cells before and after imposing applied voltage. On the  
 353 bare GCE surface, the scattering light of laser could totally not be recorded because of two short-pass 700 nm filters, but it may be  
 354 recorded inevitably due to the CEM cell itself and the increasing collection parameters of EMCCD during the imaging of cell  
 355 membrane. However, following the image processing steps mentioned in experimental sections, we observed that the pure  
 356 scattering light intensity of laser at cell regions decreased with the increase in voltage, which could be ascribed to the electron loss  
 357 process on the electrode surface. As shown in the Figure S25d, the intensity along the laser scattering spot indicated that the center  
 358 region was weaker than the background, having no influence on our HT-ECL enhancement.

359



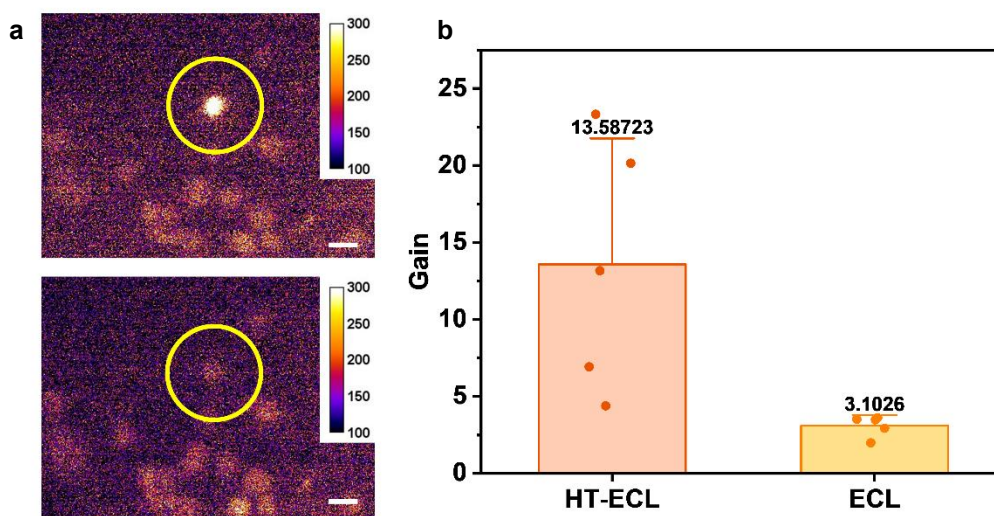

360

361 **Figure S26.** (a) The corresponding HT-ECL image (top) and ECL image (bottom) after image analysis. The yellow circle indicates the same MCF-  
 362 7 cell with HT-ECL and without HT-ECL. Scale bar (white) is 20  $\mu\text{m}$ . Exposure time is 1 s. (b) The statistic gain of HT-ECL (n=5) and ECL (n=5).  
 363 The numbers indicate the average values of gain. The error bars suggest the standard deviation.

364

365

366

## Reference

367

- 368 1 Valenti, G. *et al.* Single Cell Electrochemiluminescence Imaging: From the Proof-of-Concept to Disposable Device-Based Analysis. *J. Am. Chem. Soc.*  
 369 **139**, 16830-16837, doi:10.1021/jacs.7b09260 (2017).  
 370 2 Ma, C. *et al.* Dynamically imaging collision electrochemistry of single electrochemiluminescence nano-emitters. *Chem. Sci.* **9**, 6167-6175,  
 371 doi:10.1039/c8sc02251h (2018).  
 372 3 Liang, T. *et al.* Adapting and Remolding: Orchestrating Tumor Microenvironment Normalization with Photodynamic Therapy by Size Transformable  
 373 Nanoframeworks. *Angew. Chem. Int. Ed. Engl.* **60**, 11464-11473, doi:10.1002/anie.202102180 (2021).  
 374 4 Ma, C. *et al.* Catalytic route electrochemiluminescence microscopy of cell membranes with nitrogen-doped carbon dots as nano-coreactants. *Chem*  
 375 *Commun* **57**, 2168-2171, doi:10.1039/d0cc08223f (2021).  
 376 5 Giaccherini, A. *et al.* Analysis of mass transport in ionic liquids: a rotating disk electrode approach. *Scientific Reports* **10**, 13433, doi:10.1038/s41598-  
 377 020-70301-w (2020).  
 378 6 Ishii, J. & Ono, A. A Fourier-transform spectrometer for accurate thermometric applications at low temperatures. *Aip Conf Proc* **684**, 705-710,  
 379 doi:10.1063/1.1627210 (2003).  
 380 7 Voci, S., Al-Kutubi, H., Rassaei, L., Mathwig, K. & Sojic, N. Electrochemiluminescence reaction pathways in nanofluidic devices. *Anal Bioanal Chem*  
 381 **412**, 4067-4075, doi:10.1007/s00216-020-02630-8 (2020).  
 382 8 Guo, W., Zhou, P., Sun, L., Ding, H. & Su, B. Microtube Electrodes for Imaging the Electrochemiluminescence Layer and Deciphering the Reaction  
 383 Mechanism. *Angew. Chem. Int. Ed. Engl.* **60**, 2089-2093, doi:10.1002/anie.202012340 (2021).  
 384 9 Ma, C., Xing, Z., Gou, X., Jiang, L. P. & Zhu, J. J. A temperature-tuned electrochemiluminescence layer for reversibly imaging cell topography. *Chem.*  
 385 *Sci.* **13**, 13938-13947, doi:10.1039/d2sc04944a (2022).  
 386 10 Bolletta, F. & Bonafede, S. Chemiluminescence and Electrochemiluminescence of Coordination-Compounds. *Pure. Appl. Chem.* **58**, 1229-1232,  
 387 doi:10.1351/pac198658091229 (1986).  
 388 11 Toshimitsu, Y., Katayama, Y. & Miura, T. Electrode reactions of ruthenium-bipyridine complex in amide-type ionic liquids. *Electrochim. Acta* **82**, 43-47,  
 389 doi:10.1016/j.electacta.2012.01.113 (2012).  
 390 12 Li, Q., Zheng, J. Y., Yan, Y., Zhao, Y. S. & Yao, J. Electrogenerated chemiluminescence of metal-organic complex nanowires: reduced graphene oxide  
 391 enhancement and biosensing application. *Adv. Mater.* **24**, 4745-4749, doi:10.1002/adma.201201931 (2012).  
 392

393
